# Supplementary material for: Small extracellular vesicles from malignant ascites of patients with advanced ovarian cancer provide insights into the dynamics of the extracellular matrix
Source: PubMed Central journal article supplement (PMC8637559; doi:10.1002/1878-0261.13110), 2021-10-27

# Patient 1

Small-EVs derived from primary cell culture

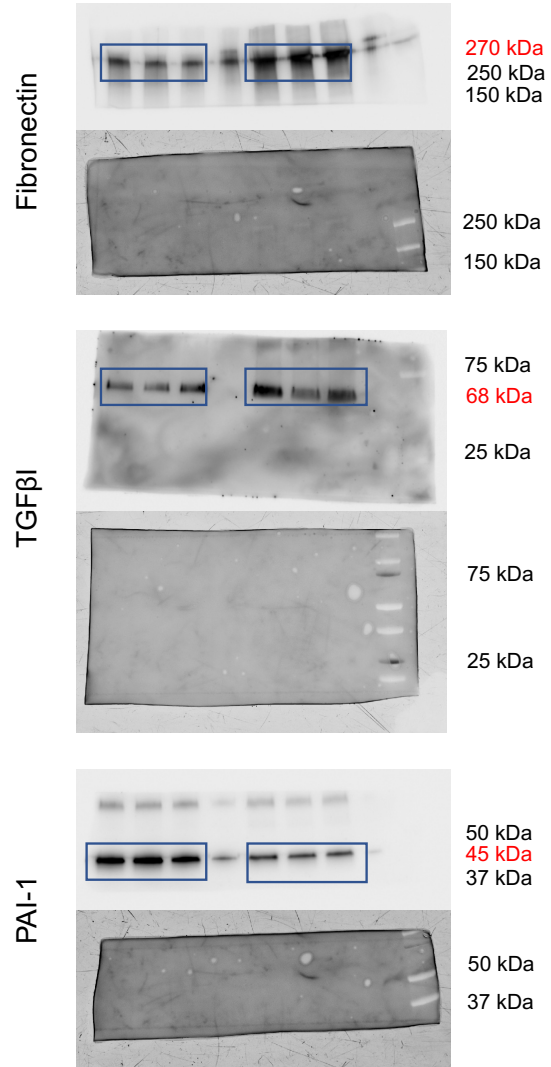

Lysates from primary cell culture

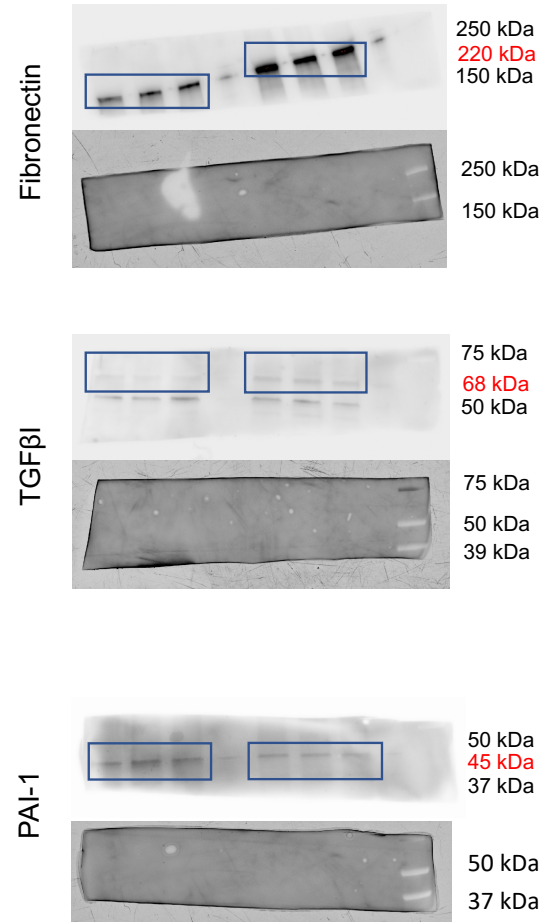

Small-EVs derived from bulk ascites fluid

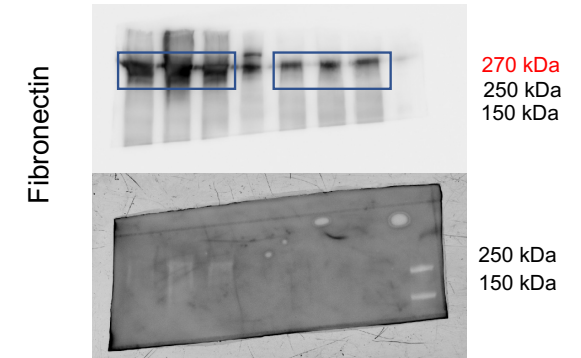

# Patient 2

Small-EVs derived from primary cell culture

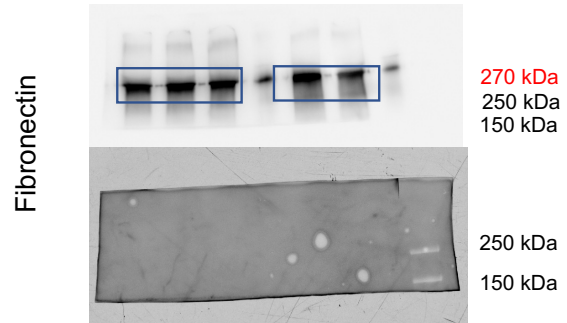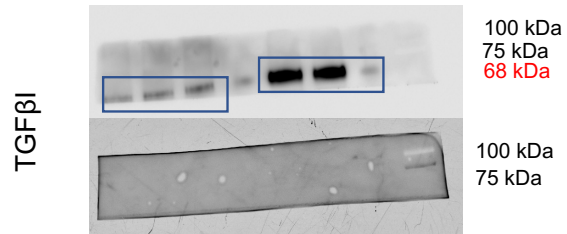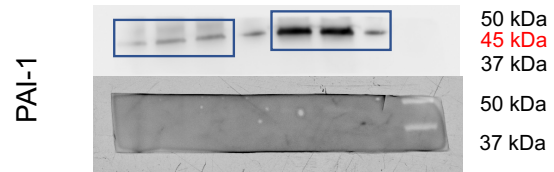

Lysates from primary cell culture

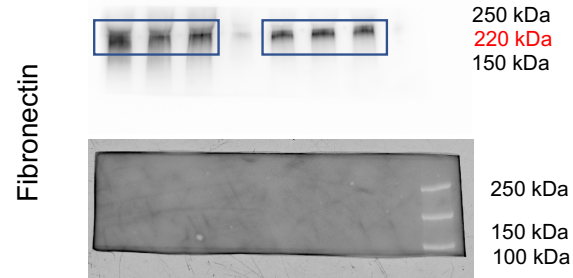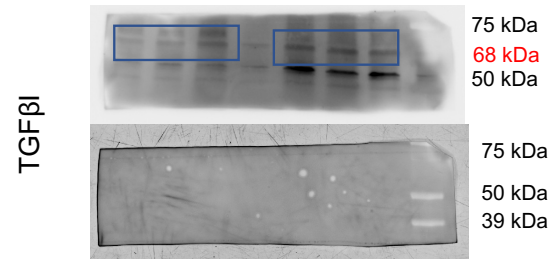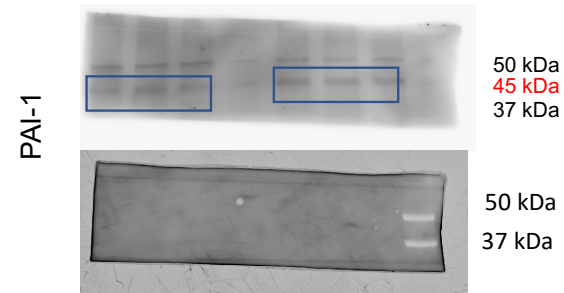

Small-EVs derived from bulk ascites fluid

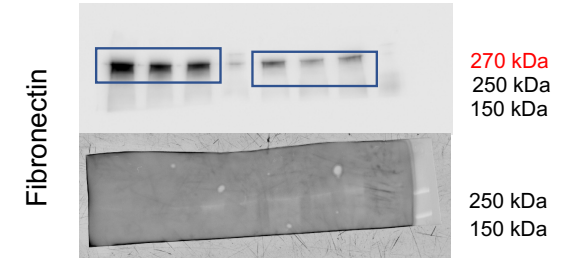

# Patient 3

Small-EVs derived from primary cell culture

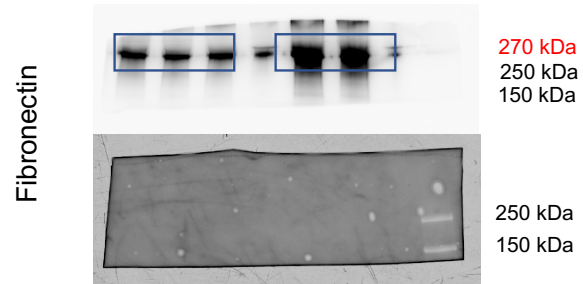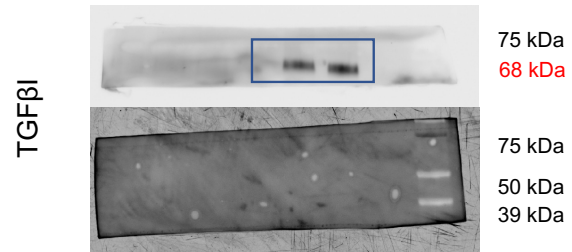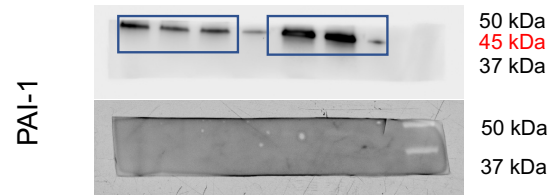

Lysates from primary cell culture

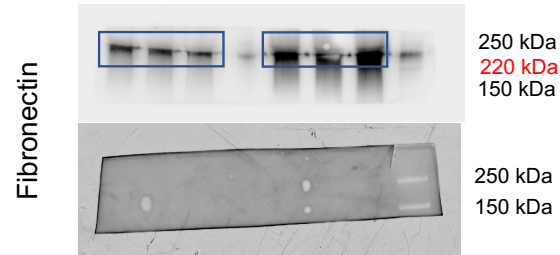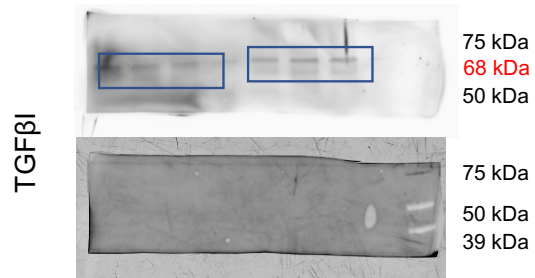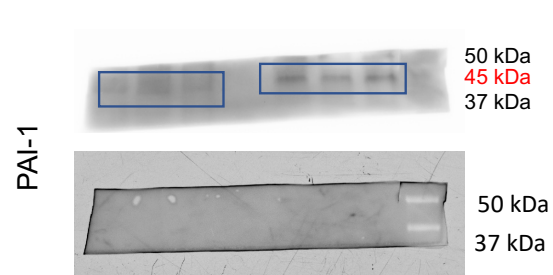

Small-Evs derived from bulk ascites fluid

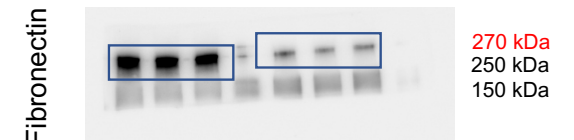

## Cohort of patients before and after chemotherapy

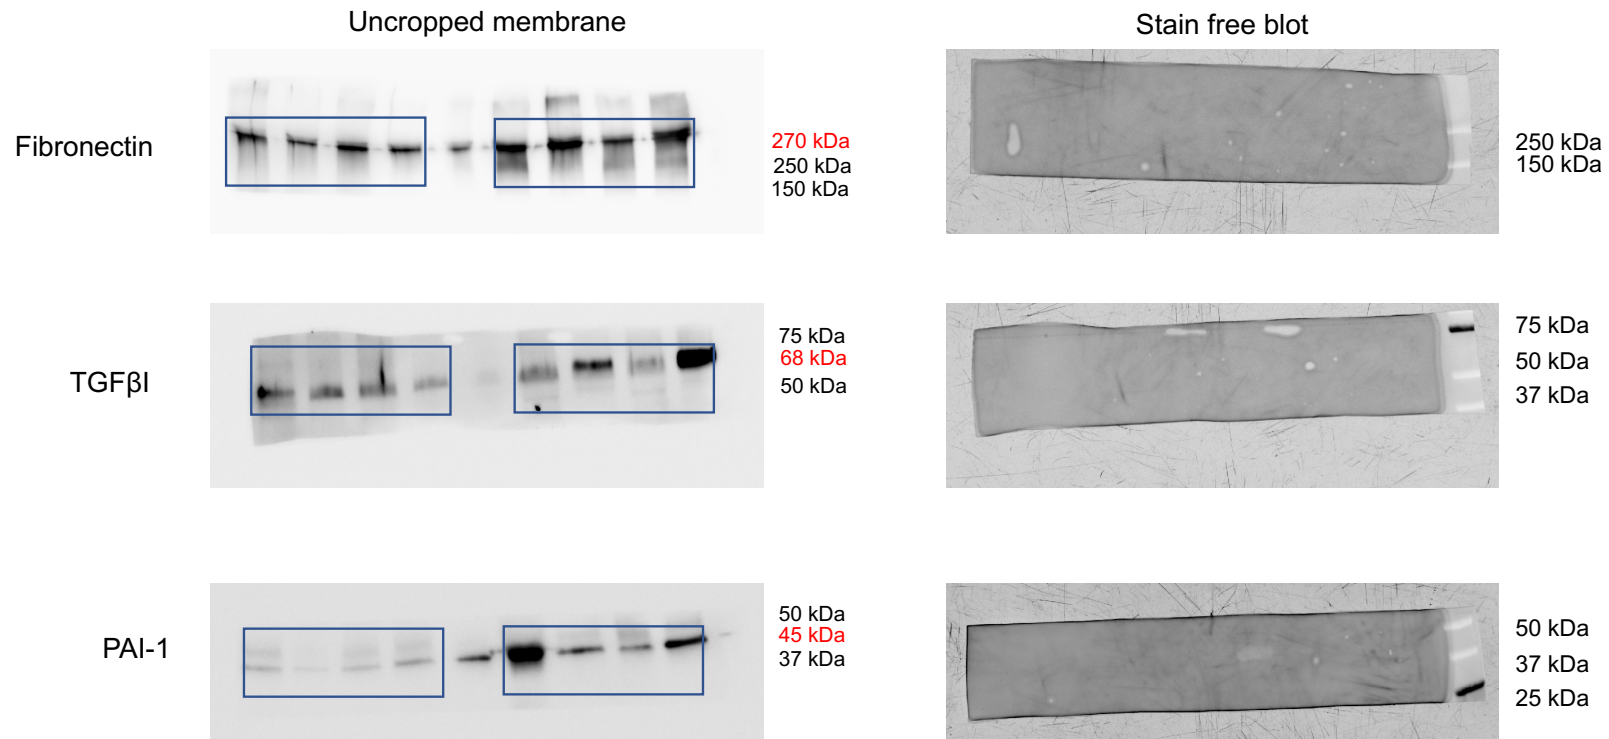

Supplement: MOL2-15-3596-s002.pdf [file MOL2-15-3596-s002.pdf]
